# Supplementary material
Source: PubMed Central journal article supplement (PMC5860863)
Supplement: DB170318SupplementaryData.pdf [file DB170318SupplementaryData.pdf]

SUPPLEMENTARY DATA

**Supplementary Figure 1.** (A) Multiple shRNA sequences targeting various regions of *Tcf7l2* mRNA were used to confirm that silencing of TCF7L2 inhibited adipogenesis, as shown by triglyceride accumulation in multiple clones of shTCF7L2 3T3-L1 cells (B) (n = 4 independent experiments for each stable clone; \*\*\*P < 0.001 one-way ANOVA Holm-Sidak multiple comparison t-test versus shSCR control). (C) Protein content and cell number at the induction of adipogenesis on D0 was not different between shSCR and shTCF7L2 (shown is data for shTCF7L2\_A).

**A**

|         | Supplier  | Plasmid     | Clone ID       | Position | Target Sequence       |
|---------|-----------|-------------|----------------|----------|-----------------------|
| shRNA_A | Dharmacon | SMARTvector | SH01-058892-01 | 1062     | TCACGCCTCTCATCACGTA   |
| shRNA_B | Sigma     | pLKO_TRC005 | TRCN0000416397 | 579      | ACGAGCTGATCTCCTTCAAAG |
| shRNA_C | Sigma     | pLKO.1      | TRCN0000012180 | 1312     | GCTGACAGTCAACGCATCTAT |

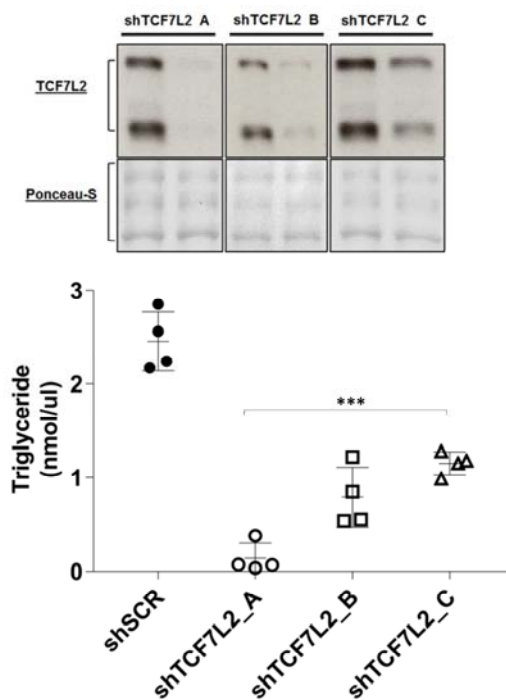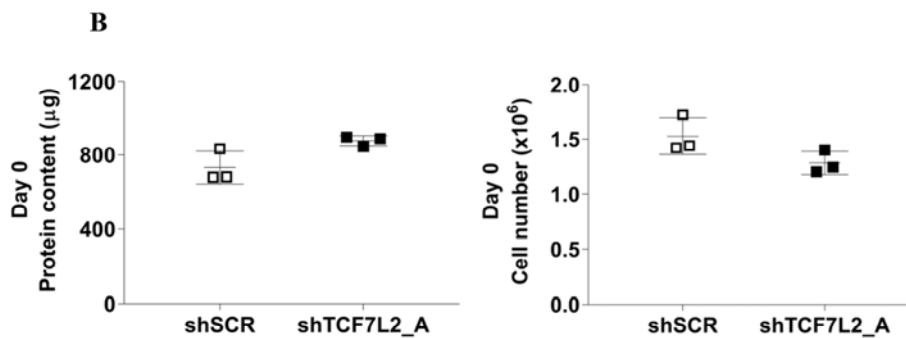

SUPPLEMENTARY DATA

**Supplementary Figure 2.** (A) Representative Western blots and corresponding quantitation for adipogenic transcription factor protein levels during adipogenesis in shSCR and shTCF7L2 3T3-L1 cells. (B) mRNA expression of adipogenic transcription factors during adipogenesis in shSCR and shTCF7L2 3T3-L1 cells (n = 3 independent experiments; \*\*\*P < 0.001 two-way ANOVA Holm-Sidak multiple comparison t-test versus D0; †P < 0.05 two-way ANOVA main effect of shTCF7L2; ^P < 0.05, ^^P < 0.01, ^^P < 0.001 two-way ANOVA time x shTCF7L2 interaction Holm-Sidak multiple comparison t-test versus corresponding shSCR time point).

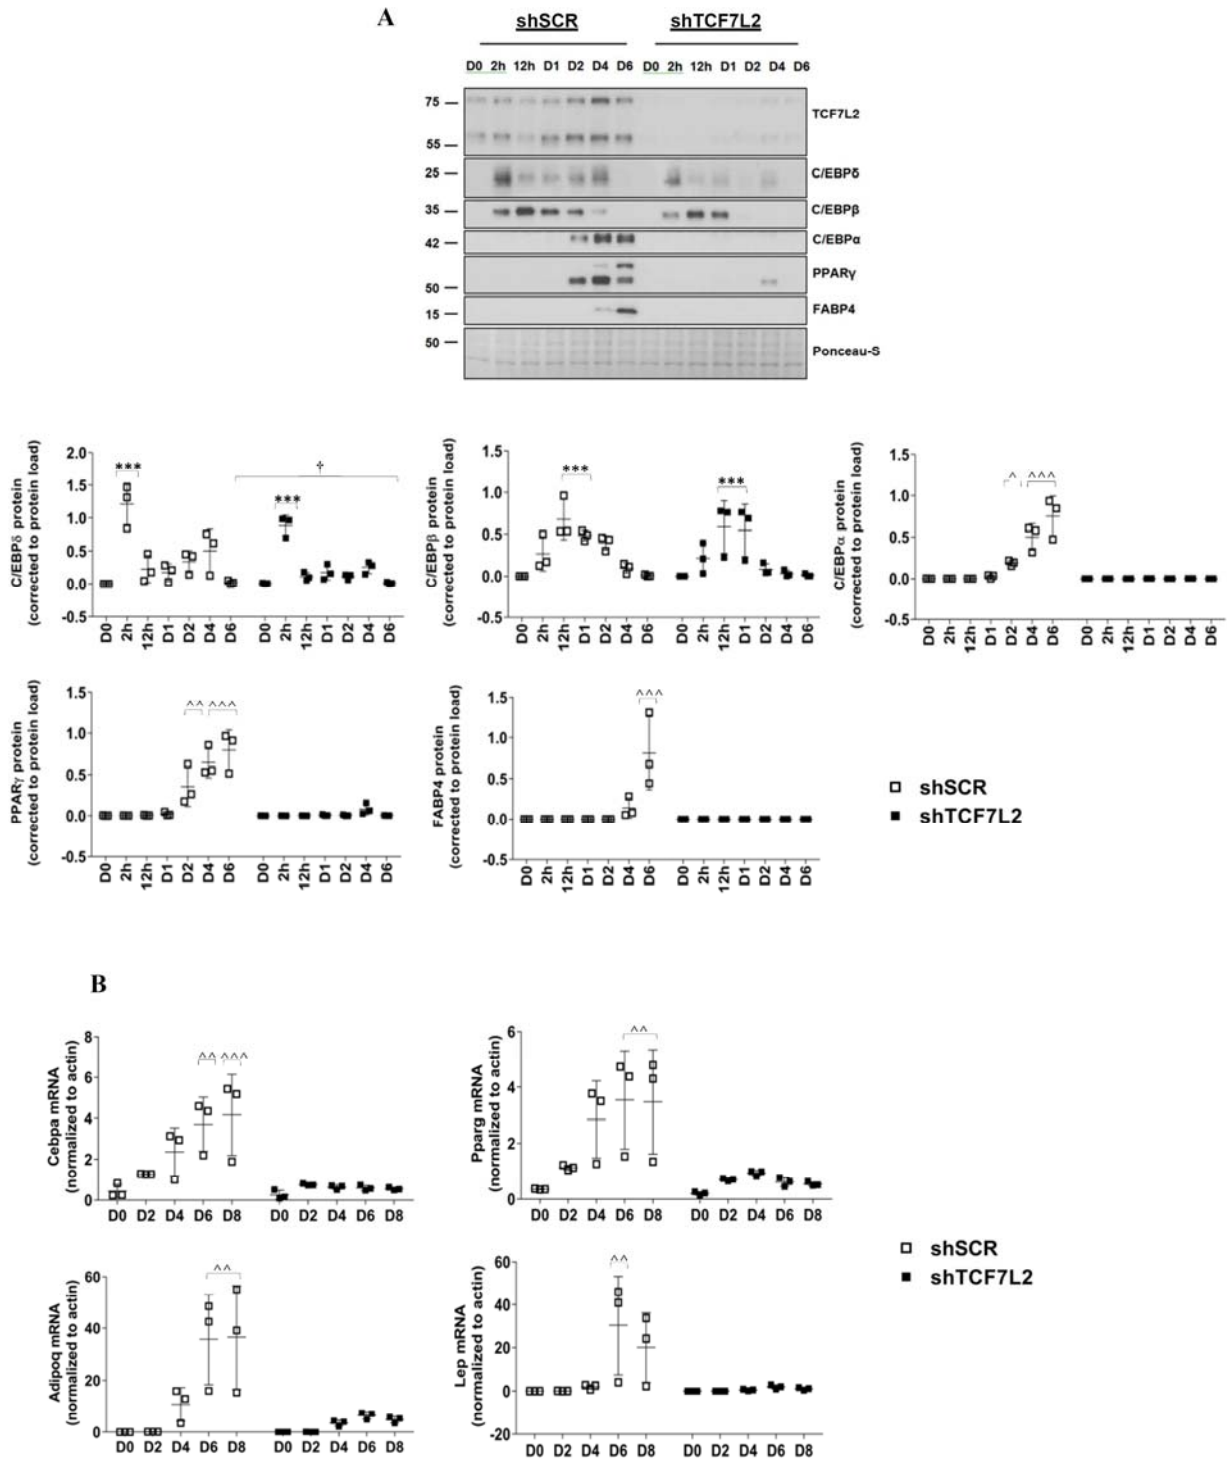

SUPPLEMENTARY DATA

**Supplementary Figure 3.** (A) Representative Western blot of insulin stimulated phosphorylation of Akt in shSCR and shTCF7L2 cells. (B) Insulin-stimulated glucose uptake (n = 4 independent experiments; \*\*\*P < 0.001 t-test versus shSCR) and *Slc2a4* mRNA expression (n = 3 independent experiments; ^P < 0.01 two-way ANOVA time x shTCF7L2 interaction Holm-Sidak multiple comparison t-test versus corresponding shSCR time point).

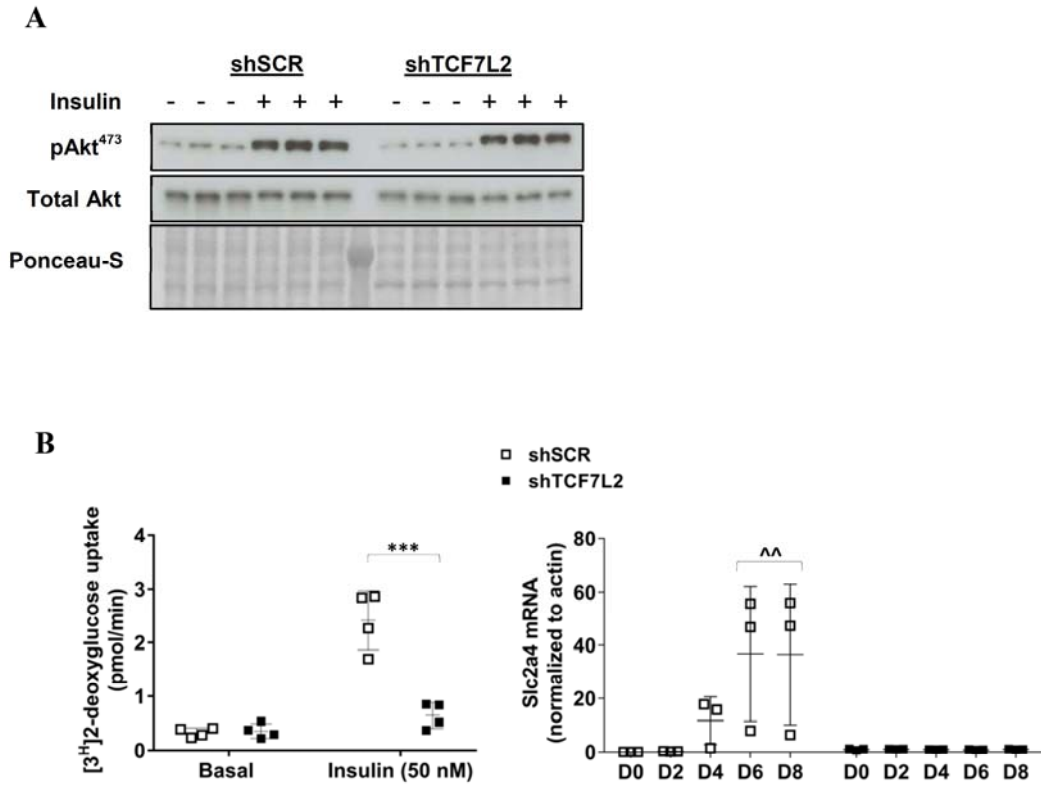

SUPPLEMENTARY DATA

**Supplementary Figure 4.** mRNA expression of key inflammatory and metabolic genes in shTCF7L2 cells. The RNA-Seq data was generated in clone A and the above qRT-PCR data was generated in clone B (see Supplementary Fig 1). Analysis was performed using Biogazelle Qbase+. (n = 3 independent experiments; \*\*P < 0.01, \*\*\*P < 0.001 t-test versus shSCR).

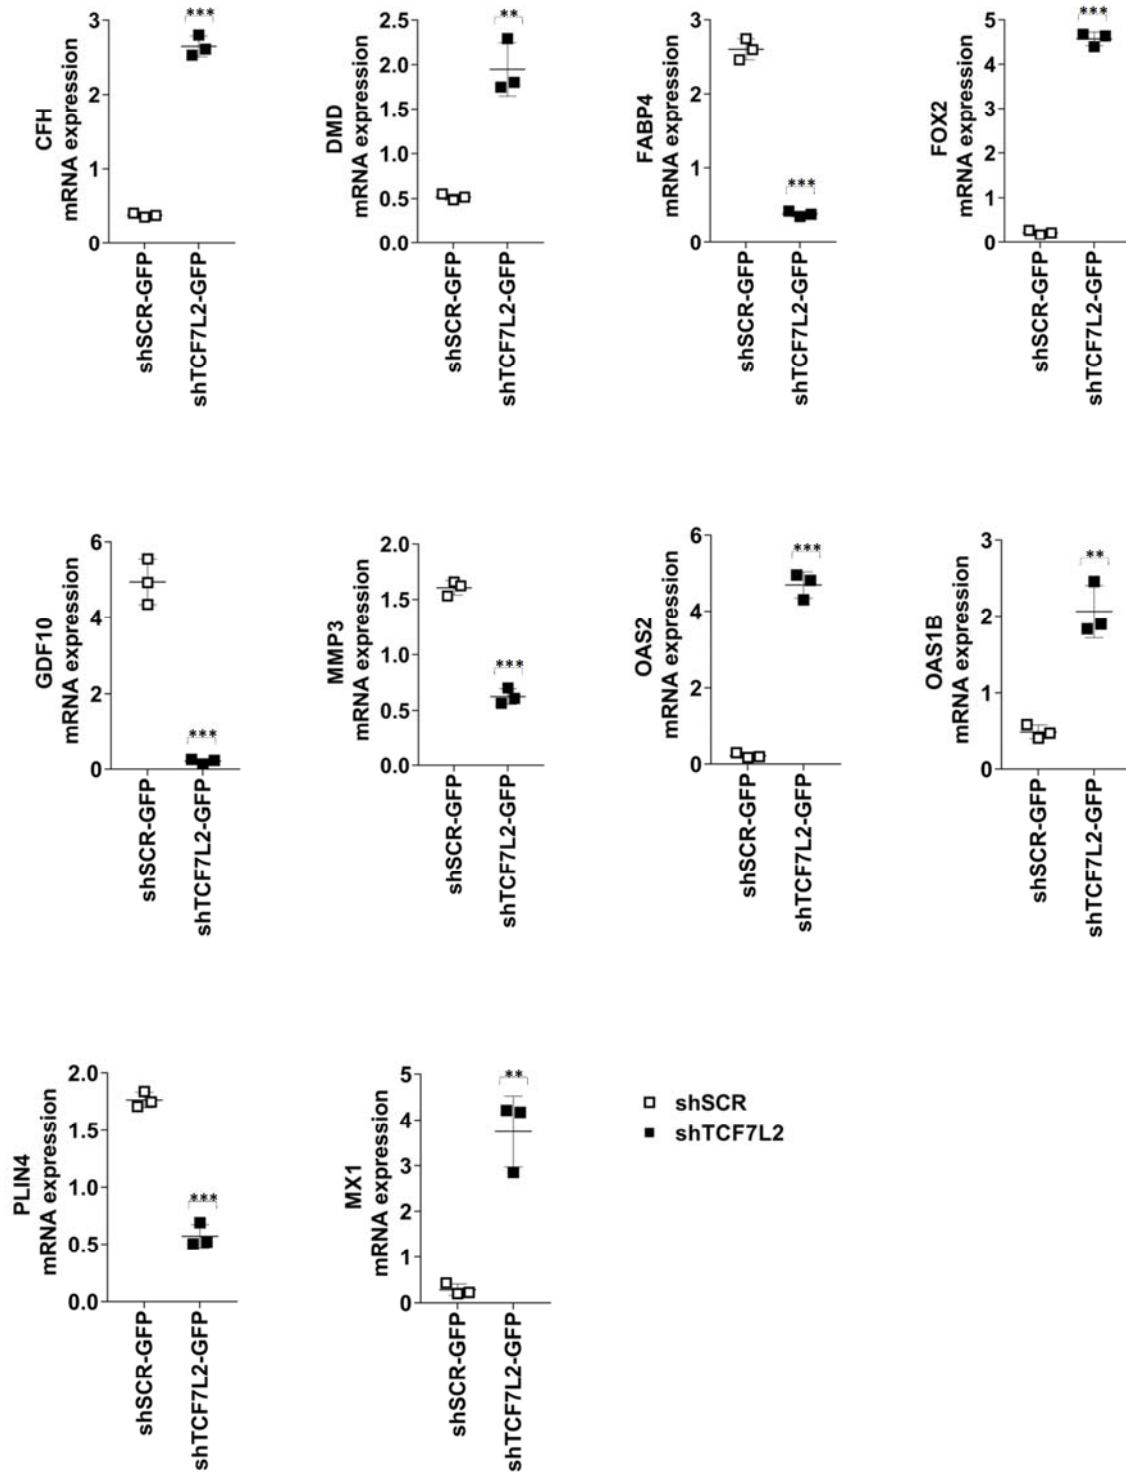

SUPPLEMENTARY DATA

**Supplementary Figure 5.** Bodyweight [**A** (rounded to nearest number) **and J**], food intake (**B and K**) and Leptin levels (**C and L**) for 3 month old female and male mice. (**D and E**) NMR analysis of total lean and fat mass, and (**F – H**) metabolic cage analysis is shown for female mice and includes assessment of total movement, respiratory exchange ratio (RER) and energy expenditure during dark and light cycles. (**I**) Net energy balance is calculated for female mice. (**M**) Liver triglyceride quantification of shown for male 3 month old mice (n = 5 – 12  $\Delta$ E11-TCF7L2, n = 6 – 11 LoxP controls; \*P < 0.05 t-test versus control mice).

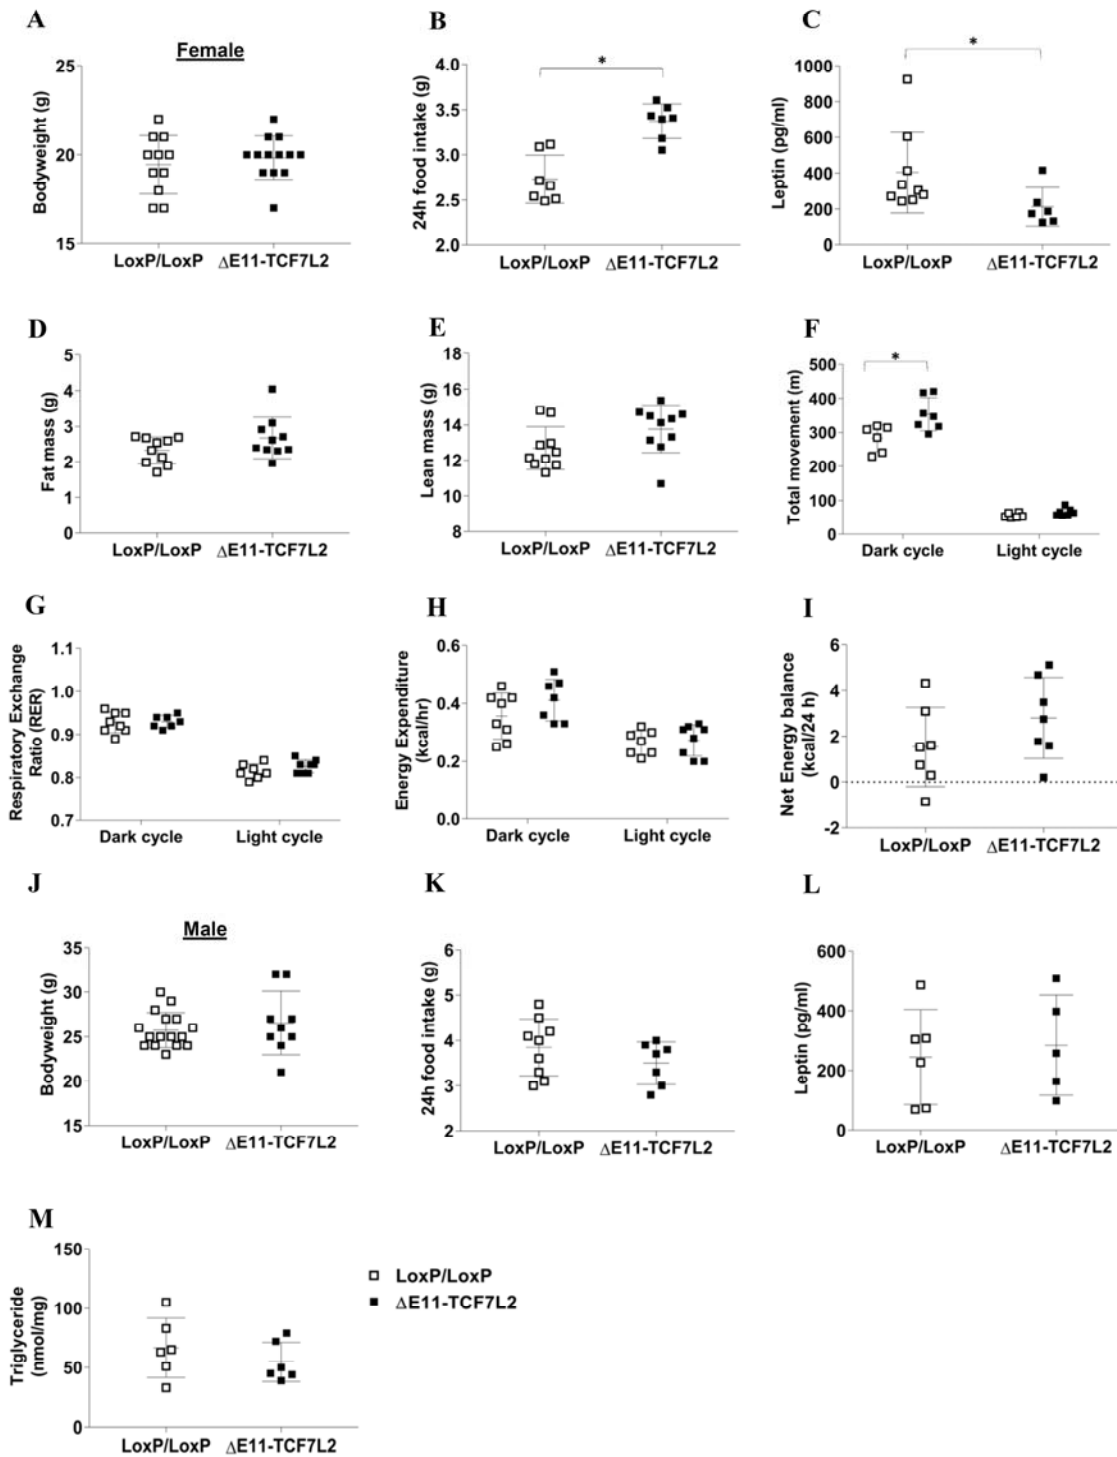

SUPPLEMENTARY DATA

**Supplementary Figure 6.** (A) Intraperitoneal glucose tolerance tests (IPGTT, n = 9  $\Delta$ E11-TCF7L2, n = 8 LoxP controls;  $\sim\sim\sim P < 0.001$  two-way ANOVA time x *Tcf7l2* genotype interaction Holm-Sidak multiple comparison t-test versus corresponding control time point). (B) Incremental area under the IPGTT curve (iAUC;  $***P < 0.001$  t-test). (C and D) Insulin tolerance tests (ITT) for female (n = 8  $\Delta$ E11-TCF7L2, n = 12 LoxP controls) and male (n = 8  $\Delta$ E11-TCF7L2, n = 7 LoxP controls) mice ( $\hat{P} < 0.05$ ,  $\sim\hat{P} < 0.01$  two-way ANOVA time x *Tcf7l2* genotype interaction Holm-Sidak multiple comparison t-test versus corresponding control time point; \* $P < 0.05$  two-way ANOVA main effect of *Tcf7l2* genotype)

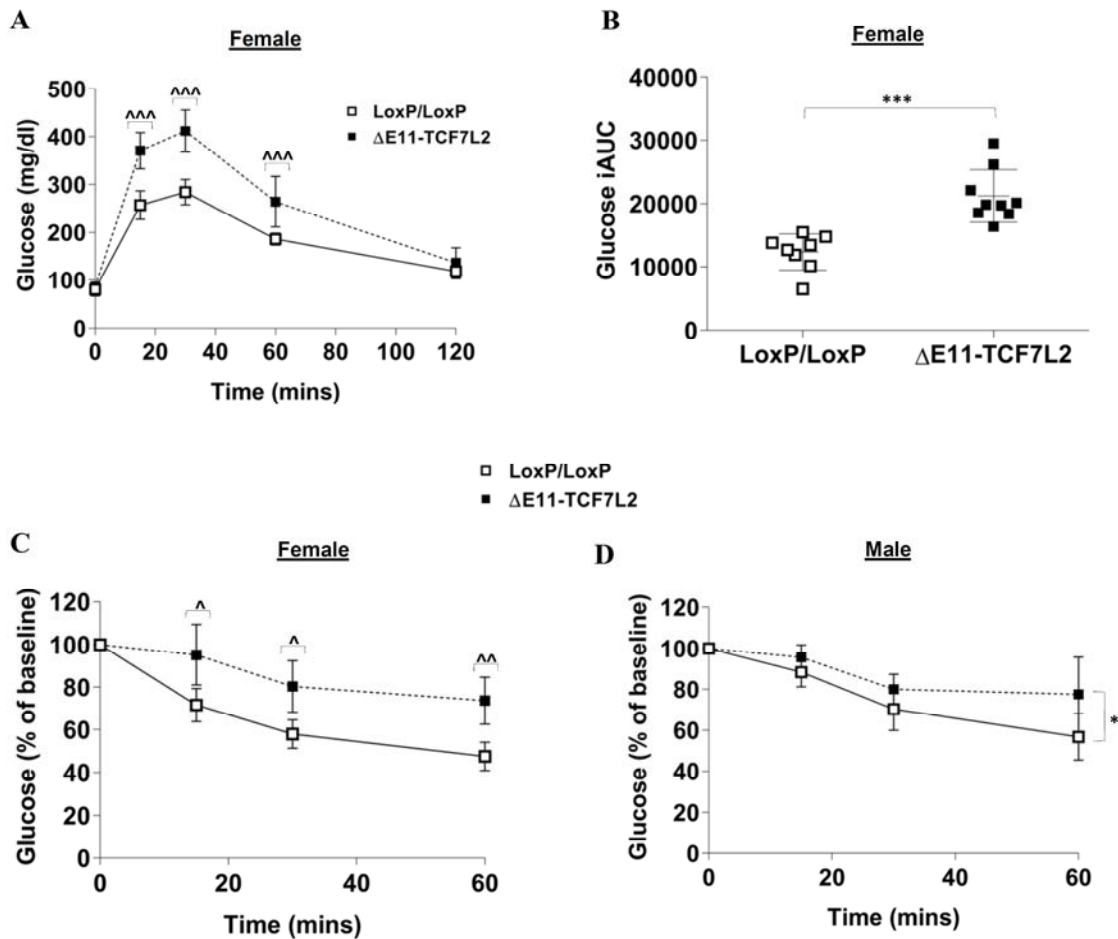

SUPPLEMENTARY DATA

**Supplementary Figure 7.** (A) Gene expression of hepatic gluconeogenic genes at the end of insulin clamp experiments, and (B) gene expression of hepatic lipogenic genes in the fasted state. Both were from 3 month old chow fed mice (\*P < 0.05, \*\*P < 0.01 t-test versus control mice, corrected for multiple comparisons using Holm-Sidak method)

**A**

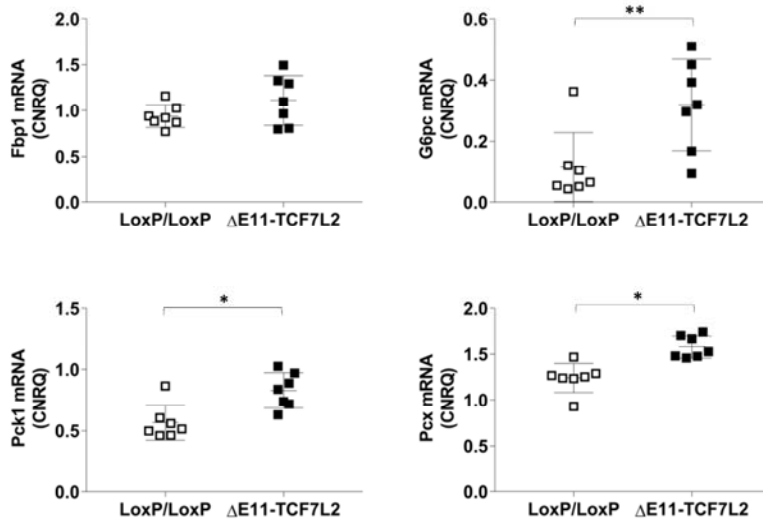

**B**

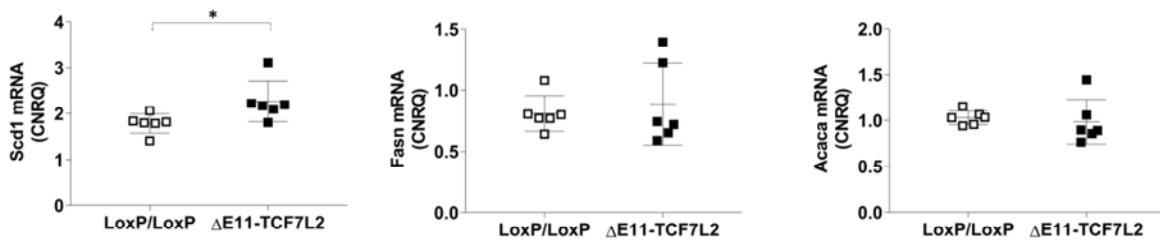

SUPPLEMENTARY DATA

**Supplementary Figure 8.** Bodyweight (A) and food intake (B) in 6 month old male mice. (C and D) NMR analysis of total lean and fat mass. (E – H) Metabolic cage analysis and net energy expenditure is shown for 6 month old male mice. (I) (n = 7 – 10  $\Delta$ E11-TCF7L2, n = 8 – 10 LoxP controls). \*P < 0.05 t-test versus control mice.

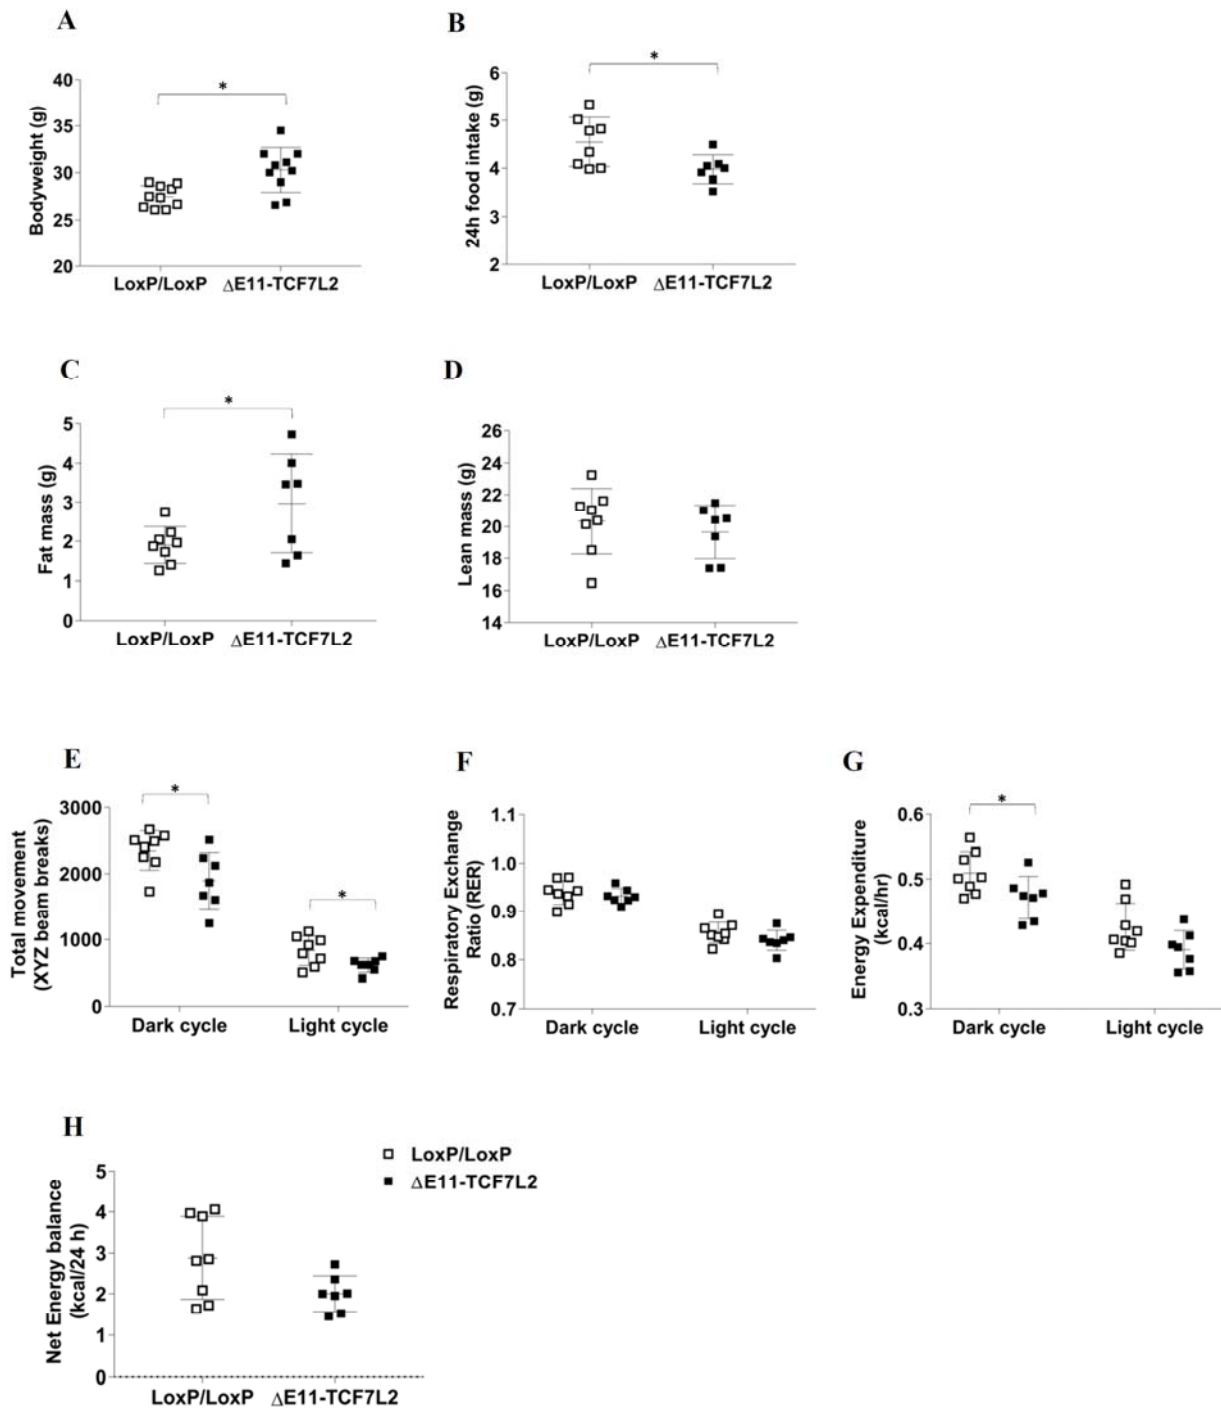



SUPPLEMENTARY DATA

**Supplementary Figure 9.** Gene expression of *Axin2*, *Ccl2*, *Dgat2*, *Cfh* and *Pparg* in isolated adipocytes from male iWAT following HFD (n = 6  $\Delta$ E11-TCF7L2, n = 8 control mice; \*P < 0.05, \*\*P < 0.01 t-test versus control)

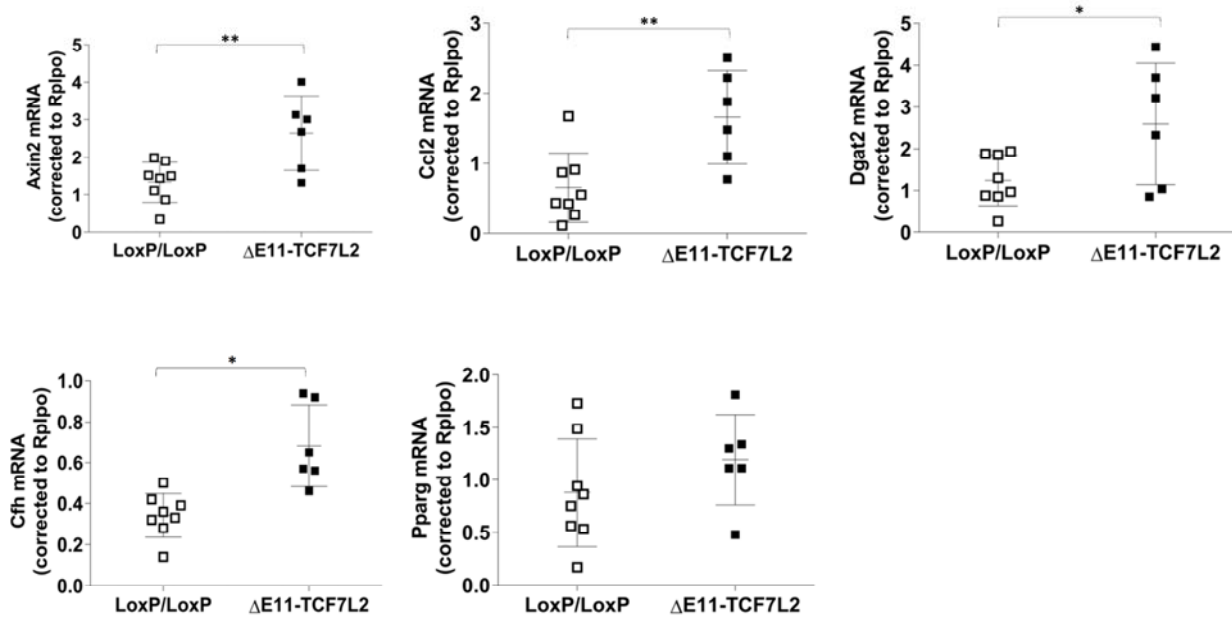

SUPPLEMENTARY DATA

**Supplementary Table 1.** Clinical characteristics of human patients used in the present study (corresponds to Figure 7)

|                          | <b>NGT</b>  | <b>IGT</b>  | <b><i>p</i></b> |
|--------------------------|-------------|-------------|-----------------|
| n                        | 21          | 22          |                 |
| Sex (M/F)                | 4/17        | 8/14        |                 |
| Age (years)              | 47 ± 2      | 49 ± 2      | 0.42            |
| BMI (kg/m <sup>2</sup> ) | 31.3 ± 1.6  | 33.7 ± 1.5  | 0.26            |
| Fasting Glucose (mg/dL)  | 92.6 ± 1.4  | 103.7 ± 1.6 | < 0.001         |
| 2h Glucose (mg/dL)       | 107.7 ± 5.8 | 160.9 ± 4   | < 0.001         |
| Fasting Insulin (mU/L)   | 5.0 ± 0.7   | 6.6 ± 0.6   | 0.09            |
| 2h Insulin (mU/L)        | 42.2 ± 7.4  | 81.8 ± 11.3 | < 0.01          |
| Fasting FFA (mmol/L)     | 0.49 ± 0.03 | 0.56 ± 0.04 | 0.18            |
| 1h FFA (mmol/L)          | 0.13 ± 0.02 | 0.20 ± 0.02 | < 0.05          |
